# Supplementary material for: When silence is safer: a review of LLM abstention in healthcare
Source: Research Square preprint supplement (doi:10.21203/rs.3.rs-8148261/v1), 2025-12-15
Supplement: Supplementary file 2 [file 326455e0eeffdbedfe9a073e.pdf]

| title                                                                                                                                                                                                | year | Medical domain                | Task                      | Technique                                                                                                                                                      | Position      | Intrinsic/<br>Extrinsic | Motivation  | Submotivation                                                              |
|------------------------------------------------------------------------------------------------------------------------------------------------------------------------------------------------------|------|-------------------------------|---------------------------|----------------------------------------------------------------------------------------------------------------------------------------------------------------|---------------|-------------------------|-------------|----------------------------------------------------------------------------|
| Detecting hallucinations in large language models using semantic entropy.                                                                                                                            | 2024 | General Medicine              | QA                        | consistency sampling + semantic entropy threshold                                                                                                              | after         | extrinsic               | uncertainty | low confidence prediction                                                  |
| Identifying Deprescribing Opportunities With Large Language Models in Older Adults: Retrospective Cohort Study.                                                                                      | 2025 | Geriatrics                    | clinical decision support | prompting (Verbalized CoT Confidence) + confidence threshold; consistency sampling                                                                             | before, after | extrinsic               | uncertainty | low confidence prediction                                                  |
| Performance of Large Language Models in Numerical Versus Semantic Medical Knowledge: Cross-Sectional Benchmarking Study on Evidence-Based Questions and Answers.                                     | 2025 | General Medicine              | QA                        | prompting (idk option included in the question)                                                                                                                | before        | extrinsic               | uncertainty | low confidence prediction                                                  |
| Evaluating artificial intelligence bias in nephrology: the role of diversity, equity, and inclusion in AI-driven decision-making and ethical regulation.                                             | 2025 | Nephrology                    | QA                        | - (just evaluates)                                                                                                                                             | -             | -                       | safety      | ethical, bias                                                              |
| A Pre-Processing Framework for Securing LLM-RAG Interfaces Against Information Leakage - Practice and Experience in Advanced Research Computing 2025: The Power of Collaboration                     | 2025 | Medical Safety                | QA                        | screening model (small, lightweight LLM, prompted to reject off domain inputs)                                                                                 | before        | extrinsic               | safety      | Harmful Content                                                            |
| CARES: Comprehensive Evaluation of Safety and Adversarial Robustness in Medical LLMs                                                                                                                 | 2025 | Medical Safety                | Alignment Evaluation      | a classifier (Qwen2.5-7B-Instruct) to detect the specific type of jailbreaking applied                                                                         | before        | extrinsic               | safety      | Harmful Content                                                            |
| MedIQ: Question-Asking LLMs and a Benchmark for Reliable Interactive Clinical Reasoning - Advances in Neural Information Processing Systems                                                          | 2024 | General Medicine              | QA                        | Prompting Strategies + consistency sampling + rationale generation                                                                                             | before        | extrinsic               | uncertainty | low confidence prediction                                                  |
| Trustworthy and Practical AI for Healthcare: A Guided Deferral System with Large Language Models                                                                                                     | 2025 | Radiology                     | report classification     | prompting (verbalized confidence) + hidden state prediction + threshold                                                                                        | before, after | extrinsic               | uncertainty | low confidence prediction                                                  |
| Evaluating Large Language Models for Health-related Queries with Presuppositions                                                                                                                     | 2024 | General Medicine              | claim verification        | - (just evaluates)                                                                                                                                             | -             | -                       | uncertainty | False or Ambiguous Claims                                                  |
| {LTRC}-{IITH} at {EHRSQL} 2024: Enhancing Reliability of Text-to-{SQL} Systems through Abstention and Confidence Thresholding - Proceedings of the 6th Clinical Natural Language Processing Workshop | 2024 | Clinical (EHR)                | text-to-SQL               | prompting (LLM used as classifier: abstain/not abstain), confidence thresholding                                                                               | before        | extrinsic               | uncertainty | Inherently Unanswerable                                                    |
| Semantic Consistency-Based Uncertainty Quantification for Factuality in Radiology Report Generation                                                                                                  | 2025 | Radiology                     | report generation         | sampling + uncertainty thresholding                                                                                                                            | after         | extrinsic               | uncertainty | low confidence prediction                                                  |
| MedSafetyBench: Evaluating and Improving the Medical Safety of Large Language Models - Advances in Neural Information Processing Systems                                                             | 2024 | Medical Safety                | Alignment Evaluation      | fine tuning                                                                                                                                                    | within        | intrinsic               | safety      | Adversarial Prompt<br>Harmful Content                                      |
| Energy Landscapes Enable Reliable Abstention in Retrieval-Augmented Large Language Models for Healthcare                                                                                             | 2025 | obstetrics and gynaecology    | QA                        | OOD score + trained a MLP to classify -> confidence estimation                                                                                                 | before        | extrinsic               | uncertainty | OOD, outside healthcare                                                    |
| Probing Hidden States for Calibrated, Alignment-Resistant Predictions in LLMs                                                                                                                        | 2025 | Medical Safety                | Alignment Evaluation      | lightweight classifier trained on frozen LLM activations; uses signals from selected layers to estimate calibrated confidence and detect possible misalignment | within        | extrinsic               | safety      | Adversarial Prompt                                                         |
| LMOD: A Large Multimodal Ophthalmology Dataset and Benchmark for Large Vision-Language Models                                                                                                        | 2024 | Ophthalmology                 | report classification     | - (just evaluates)                                                                                                                                             | -             | -                       | uncertainty | Incomplete Information                                                     |
| Smarter Together: Combining Large Language Models and Small Models for Physiological Signals Visual Inspection                                                                                       | 2025 | cardiology and sleep medicine | clinical decision support | ConMIL (MIL + QTrans-Pooling + conformal calibration) → interpretable, confidence-aware classifier for physiological signals.                                  | before        | extrinsic               | uncertainty | low confidence prediction                                                  |
| Poison Once, Refuse Forever: Weaponizing Alignment for Injecting Bias in LLMs                                                                                                                        | 2025 | Medical Safety                | Alignment Evaluation      | fine tuning                                                                                                                                                    | within        | intrinsic               | safety      | Adversarial Prompt                                                         |
| Trustworthy Agents for Electronic Health Records through Confidence Estimation                                                                                                                       | 2025 | Clinical (EHR)                | QA                        | prompting (verbalized confidence) + another LLM that looks at the main's LLM reasoning and computes a score                                                    | before, after | extrinsic               | uncertainty | low confidence prediction                                                  |
| ASTRID - An Automated and Scalable TRIaD for the Evaluation of RAG-based Clinical Question Answering Systems                                                                                         | 2025 | Ophthalmology                 | QA                        | - (just evaluates)                                                                                                                                             | -             | -                       | uncertainty | outside healthcare                                                         |
| AT-CXR: Uncertainty-Aware Agentic Triage for Chest X-rays                                                                                                                                            | 2025 | Radiology                     | image classification      | CNN classification probability and OOD score - input into a LLM acting as a router                                                                             | before        | extrinsic               | uncertainty | OOD, low confidence prediction                                             |
| Don't Hallucinate, Abstain: Identifying LLM Knowledge Gaps via Multi-LLM Collaboration                                                                                                               | 2024 | medical genetics              | QA                        | two multi-LLM abstention methods— Cooperate and Compete                                                                                                        | after         | extrinsic               | uncertainty | inherently unanswerable, OOD                                               |
| AbstentionBench: Reasoning LLMs Fail on Unanswerable Questions                                                                                                                                       | 2025 | General Medicine              | QA                        | prompting                                                                                                                                                      | before        | extrinsic               | uncertainty | False/Ambiguous Query<br>Inherently Unanswerable<br>Incomplete Information |
| Characterizing LLM Abstention Behavior in Science QA with Context Perturbations                                                                                                                      | 2024 | General Medicine              | QA                        | prompting (removing, replacing, and augmenting provided contexts to control the answerability of questions)                                                    | before        | extrinsic               | uncertainty | False/Ambiguous Query<br>Incomplete Information                            |
| Learn to Refuse: Making Large Language Models More Controllable and Reliable through Knowledge Scope Limitation and Refusal Mechanism                                                                | 2024 | General Medicine              | QA                        | Knowledge Base (KB) of verified factual entries that defines what an LLM can safely answer                                                                     | before        | extrinsic               | uncertainty | low confidence prediction                                                  |

|                                                                                      |      |                  |    |                                                                             |        |           |             |                           |
|--------------------------------------------------------------------------------------|------|------------------|----|-----------------------------------------------------------------------------|--------|-----------|-------------|---------------------------|
| Llamas Know What GPTs Don't Show: Surrogate Models for Confidence Estimation         | 2023 | General Medicine | QA | use a surrogate model's confidence and combine them with the target model's | after  | extrinsic | uncertainty | low confidence prediction |
| Keeping LLMs Aligned After Fine-tuning: The Crucial Role of Prompt Templates         | 2025 | Medical Safety   | QA | fine tuning                                                                 | within | intrinsic | safety      | Harmful Content           |
| InferAligner: Inference-Time Alignment for Harmlessness through Cross-Model Guidance | 2024 | Medical Safety   | QA | inference-time activation steering                                          | within | extrinsic | safety      | Harmful Content           |
| Learning to Say "I Don't Know": A Vision for Abstention in Large Language Models     | 2025 | General Medicine | QA | - (just evaluates)                                                          | -      | -         | uncertainty | low confidence prediction |
